1 **Calreticulin co-expression supports high level production of a recombinant SARS-CoV-**  
2 **2 spike mimetic in *Nicotiana benthamiana***

3 \*Emmanuel Margolin<sup>1,2,3,4</sup>, Matthew Verbeek<sup>4</sup>, Ann Meyers<sup>4</sup>, Ros Chapman<sup>1,3</sup>, Anna-Lise  
4 Williamson<sup>1,2,3</sup>, Edward P Rybicki<sup>1,3,4</sup>

5 **Affiliations:**

6 <sup>1</sup>Division of Medical Virology, Department of Pathology, Faculty of Health Sciences,  
7 University of Cape Town, South Africa

8 <sup>2</sup>Wellcome Trust Centre for Infectious Disease Research in Africa, University of Cape Town,  
9 South Africa

10 <sup>3</sup>Institute of Infectious Disease and Molecular Medicine, Faculty of Health Sciences,  
11 University of Cape Town, South Africa

12 <sup>4</sup>Biopharming Research Unit, Department of Molecular and Cell Biology, University of Cape  
13 Town, South Africa

14 \*Correspondence: Emmanuel.margolin@uct.ac.za;

15 **Abstract**

16 An effective prophylactic vaccine is urgently needed to protect against SARS-CoV-2  
17 infection. The viral spike, which mediates entry into cells by interacting with the host  
18 angiotensin-converting enzyme 2, is the primary target of most vaccines in development.  
19 These vaccines aim to elicit protective immunity against the glycoprotein by use of  
20 inactivated virus, vector-mediated delivery of the antigen *in vivo*, or by direct immunization  
21 with the purified antigen following expression in a heterologous system. These approaches  
22 are mostly dependent on the growth of mammalian or insect cells, which requires a  
23 sophisticated infrastructure that is not generally available in developing countries due to the  
24 incumbent costs which are prohibitive. Plant-based subunit vaccine production has long been  
25 considered as a cheaper alternative, although low expression yields and differences along the  
26 secretory pathway to mammalian cells have posed a challenge to producing certain viral  
27 glycoproteins. Recent advances that have enabled many of these constraints to be addressed  
28 include expressing the requisite human proteins in plants to support the maturation of the  
29 protein of interest. In this study we investigated these approaches to support the production of  
30 a soluble and putatively trimeric SARS-CoV-2 spike mimetic in *Nicotiana benthamiana* via

31 transient *Agrobacterium*-mediated expression. The co-expression of human calreticulin  
32 dramatically improved the accumulation of the viral spike, which was barely detectable in the  
33 absence of the co-expressed accessory protein. The viral antigen was efficiently processed  
34 even in the absence of co-expressed furin, suggesting that processing may have occurred at  
35 the secondary cleavage site and was mediated by an endogenous plant protease. In contrast,  
36 the spike was not efficiently processed when expressed in mammalian cells as a control,  
37 although the co-expression of furin improved processing considerably. This study  
38 demonstrates the feasibility of molecular engineering to improve the production of viral  
39 glycoproteins in plants, and supports plant-based production of SARS-CoV-2 spike-based  
40 vaccines and reagents for serological assays.

#### 41 **Introduction:**

42 The absence of suitable infrastructure to produce vaccines or diagnostics to combat emerging  
43 viruses leaves most developing countries vulnerable and unable to respond appropriately to  
44 emerging disease threats. This was highlighted during the 2009 H1N1 pandemic, and remains  
45 a major challenge to this day, as evidenced by the ongoing SARS-CoV-2 pandemic [1].  
46 Whilst there are currently over 100 vaccines in preclinical development and 10 in clinical  
47 testing, none of these are being developed in Africa, and concerns have been raised as to  
48 whether the current world manufacturing capacity will be sufficient to accommodate the  
49 global demand for a SARS-CoV-2 vaccine [2].

50 Following the 2009 H1N1 pandemic, it was acknowledged that the accepted vaccine  
51 manufacturing paradigm was not equipped to contend with pandemic outbreaks due to  
52 limitations of production scale and slow development time lines [2]. Plant-based vaccine  
53 production was therefore proposed as an alternative platform for vaccine development, due to  
54 the potential for rapid large scale antigen production [3]. The system is also well-suited to  
55 developing countries where financial resources are often lacking, as the costs to establish a  
56 manufacturing facility and to produce pharmaceuticals are lower than those required for  
57 conventional mammalian cell production platforms [4]. Accordingly, several candidate  
58 influenza subunit vaccines have been produced in plants and have subsequently been tested in  
59 clinical trials [5-7]. These vaccines are based on the viral haemagglutinin glycoprotein, which  
60 accumulates at high levels in plants and elicits protective immunity, despite not being  
61 efficiently proteolytically cleaved in the system [8]. A quadrivalent plant-produced influenza  
62 vaccine produced by Medicago Inc. is currently under consideration by Health Canada [9].

63 Many other viral glycoproteins, however, do not accumulate at such high levels in plants and  
64 the host cellular machinery may not adequately support critical folding and processing events  
65 that are required for glycoprotein maturation [3]. Furin, the enzyme responsible for the  
66 proteolytic processing of many viral glycoproteins, is not naturally produced in plants [10].  
67 Additional constraints, such as the host chaperone machinery or differences in the plant  
68 oligosaccharyltransferase complex, may also complicate the production of, and glycosylation  
69 of, certain viral glycoproteins *in planta* [11-13]. Recently, it has been proposed that  
70 engineering the plant secretory pathway to support the production of viral glycoproteins  
71 could improve their accumulation in plants, and support their maturation during synthesis [9].  
72 The co-expression of human chaperones has recently been reported to improve the  
73 accumulation of a range of envelope viral glycoproteins in *N. benthamiana*, including the  
74 HIV envelope glycoprotein and the Epstein-Barr gp350 glycoprotein, which are possibly  
75 amongst the most complex proteins produced in a plant expression system to date [13]. This  
76 approach was also combined with the expression of human furin to support proteolytic  
77 processing *in planta*, where this would not otherwise occur [13].

78 Several plant biotechnology companies have released press statements reporting the  
79 production of candidate SARS-CoV-2 vaccines in *N. benthamiana*, although it is not clear  
80 which antigens are being produced or which expression approach is being employed. The  
81 viral spike is the logical target for vaccine development as the glycoprotein is critical for the  
82 infection of target cells [14]. The spike comprises of a heavily glycosylated trimer that  
83 initiates infection by engaging the host angiotensin converting enzyme 2 [15, 16]. In addition  
84 to glycosylation, the spike also undergoes proteolytic maturation by furin proteases during its  
85 synthesis [17]. It is presently unclear if the spike glycoprotein can be produced at high levels  
86 in plants, if it requires further modification to accumulate at reasonable levels, or if it will be  
87 appropriately folded and processed along the secretory pathway. Therefore, in this study we  
88 explored the co-expression of human chaperones and the protease furin to support the  
89 production of a soluble SARS-CoV-2 spike glycoprotein, with the intention of developing  
90 capacity to cheaply produce vaccine antigens and diagnostic reagents for further  
91 development.

## 92 **Results:**

### 93 Modification of the SARS-CoV-2 spike sequence for heterologous expression

94 A soluble spike antigen (S $\Delta$ TM), consisting of both the S1 and S2 subunits but lacking the  
95 transmembrane and cytoplasmic domains, was designed for optimal expression and  
96 processing in plants (**Figure 1A**). The modified spike included an optimized cleavage  
97 sequence (RRRRRR) to promote processing by furin, as previously reported for the HIV  
98 envelope glycoprotein when produced in both plants and mammalian cells [13, 18]. The  
99 synthesized sequence was also human codon optimized for dual expression in human and  
100 plant cells, resulting in a 56% GC content. This codon optimization strategy was informed by  
101 several other studies where human codon optimization yielded higher expression than the  
102 corresponding plant codon usage [1, 19, 20].

### 103 Expression of the SARS-CoV-2 spike in *Nicotiana benthamiana*

104 Three different transient expression strategies were investigated to produce the SARS-CoV-2  
105 spike in plants. These included the transient expression of the protein alone, co-expression  
106 with each of the lectin binding chaperones calreticulin (CRT) and calnexin (CNX), and the  
107 co-expression of the spike with each of the chaperones and human furin. Recombinant *A.*  
108 *tumefaciens* encoding the heterologous proteins were vacuum infiltrated into *N. benthamiana*  
109 and leaf-derived protein extract was subjected to western blotting to confirm expression of  
110 the recombinant protein (**Figure 1B**). In the absence of any co-expressed chaperone, a faint  
111 band corresponding to the uncleaved spike (S $\Delta$ TM) protein was detected above the 190 kDa  
112 marker. In contrast, calreticulin co-expression resulted in a clear product at this size, as well  
113 as a band between 80 kDa and 100 kDa which corresponds to the expected S2 cleavage  
114 product. Processing occurred in the absence of co-expressed furin and was not improved  
115 when the protease was co-expressed with the glycoprotein and the chaperone. Calnexin co-  
116 expression did not appear to improve the accumulation of the spike.

### 117 Transient expression of the SARS-CoV-2 spike in mammalian cells

118 The S $\Delta$ TM antigen was also expressed in mammalian cells as a control to verify that the  
119 products from *N. benthamiana* were of comparable size. This also served as a proxy to  
120 determine if there was evidence of under glycosylation of the protein in plants, as has been  
121 described for other proteins [12]. In addition, the expression plasmid encoding the spike was  
122 also co-transfected with a second plasmid encoding furin at increasing ratios. Western  
123 blotting of lysate from transfected cells confirmed the expression of the recombinant protein  
124 and yielded products of the same size as those observed in plants (**Figure 1C**). In  
125 contradiction to other published results, the protein was predominantly unprocessed in

126 mammalian cells despite including a modified site for improved processing [17]. Co-  
127 expression of furin did however improve processing, yielding the expected cleavage product,  
128 which increased in intensity with higher levels of furin expression.

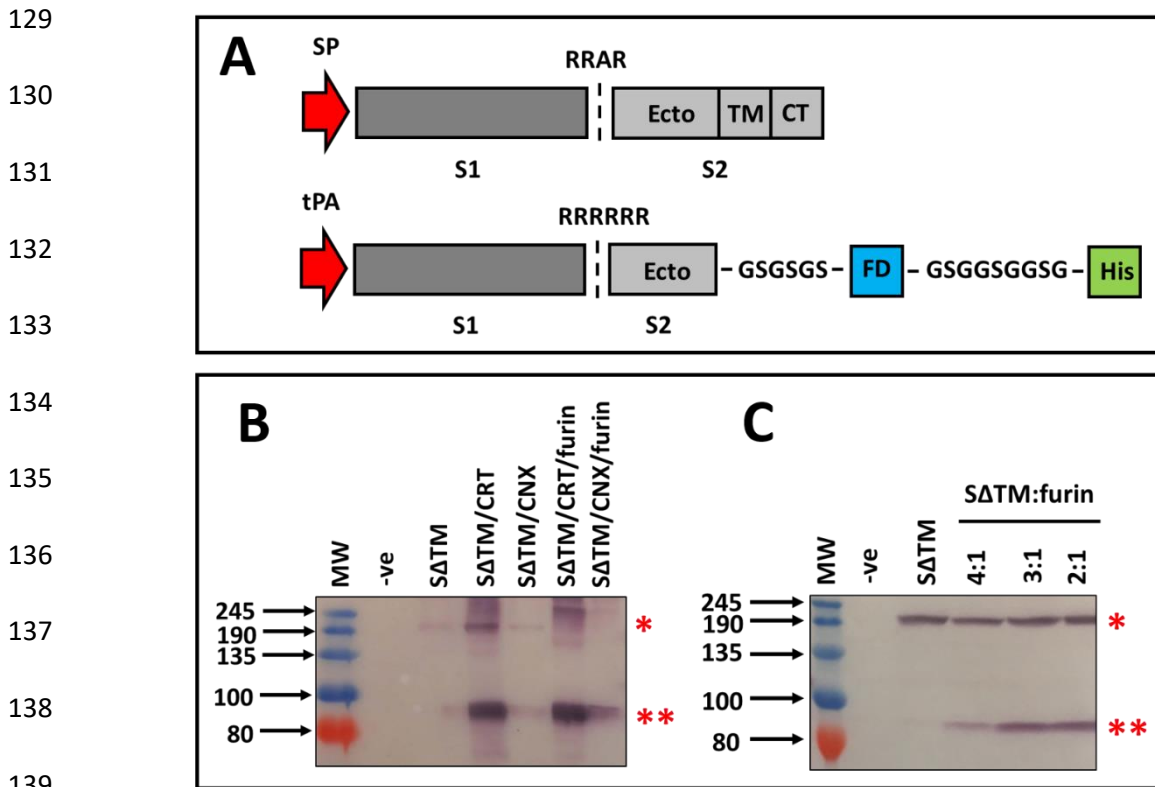

140 **Figure 1: Design and expression of an engineered SARS-CoV-2 spike mimetic. A)**

141 Schematic of the native spike glycoprotein (top) and modified SATM antigen (bottom) that  
142 was designed for heterologous expression. The S1 and S2 subunits of the spike are denoted as  
143 dark and light grey boxes respectively. The leader sequence is indicated by a red arrow. The  
144 furin cleavage site is indicated by the vertical dotted line the sequence indicated above. The  
145 GCN4 foldon (FD) is indicated as a blue box. The polyhistidine tag (His) is shown as a green  
146 box. (SP= native signal peptide, tPA= tissue plasminogen activator leader sequence, Ecto =  
147 ectodomain of S2, TM= transmembrane domain). B) Western blotting of plant lysate to  
148 detect expression of the SARS-CoV-2 spike antigen following agroinfiltration. A stroke (/)  
149 indicates where more than 1 protein was co-expressed. (-ve=uninfiltrated, SATM=soluble  
150 spike antigen, CRT=calreticulin, CNX=calnexin). C) Western blotting of transfected  
151 mammalian lysate following transient expression of the recombinant spike protein. The  
152 recombinant spike protein was detected using polyclonal mouse anti-His antibody. In both B)  
153 and C) the uncleaved product is indicated by a \* and the cleaved product is indicated by a \*\*.

154

## 155 **Discussion and conclusions:**

156 This study describes the first publicly available account detailing the expression of the  
157 SARS-CoV-2 spike in a plant-based expression system. Consistent with other studies  
158 reporting inefficient production of viral glycoproteins in plants, we noted that the spike  
159 glycoprotein accumulates at low levels in plants using routine expression approaches [3].  
160 However, the co-expression of human CRT, as was also the case with soluble HIV Env  
161 trimers [13], improved the accumulation of the protein considerably, enabling the production  
162 of the antigen at sufficient levels to warrant further development as a vaccine antigen or as a  
163 diagnostic reagent. Whilst the soluble protein benefitted from co-expression of CRT,  
164 production of the full-length spike may require the co-expression of CNX which  
165 preferentially mediates the folding of membrane-bound glycoproteins. Other comparable  
166 soluble spike antigens are also in development, such as the stabilized prefusion trimer  
167 developed by the University of Queensland. Interestingly, the spike was efficiently processed  
168 in plants, despite the lack of furin production along the secretory pathway, and processing  
169 was not improved following the co-expression of the protease. This may be due to  
170 recognition of a secondary cleavage site by an endogenous plant protease. The sizes of the  
171 recombinant protein products produced in mammalian cells and plants were indistinguishable  
172 following western blotting, and did not suggest that under glycosylation of the antigen would  
173 be a concern. However, further experiments are required to confirm this. This work lends  
174 credence to developing molecular engineering approaches to support the production of  
175 complex biologics in plants, and may have similar value to support the production of other  
176 SARS-CoV-2 spike glycoprotein-based antigens and diagnostics that are being pursued in  
177 plant systems.

## 178 **Experimental procedures**

### 179 Antigen design and generation of recombinant expression plasmids

180 A soluble derivative of the SARS-CoV-2 spike was designed based on the first publicly  
181 available sequence (GenBank accession: MN908947.3). The coding sequence was truncated  
182 to remove the transmembrane and cytoplasmic domains of the glycoprotein. The native  
183 leader sequence was replaced with the tissue plasminogen activator (tPA) signal peptide and  
184 the putative furin recognition sequence (RRAR) was replaced with a hexa-arginine  
185 (RRRRRR) motif to promote proteolytic processing. A GCN4 Fibritin trimerization motif  
186 was incorporated at the end of the gene sequence preceded by a flexible linker peptide

187 (GSGSGS). A polyhistidine (HHHHHH) affinity tag was added to the C-terminal end of the  
188 antigen after a second linker (GSGGSGGSG). The antigen coding sequence was synthesized  
189 by GenScript to reflect the preferred human codon usage and synthetic restriction sites were  
190 added to the 5' (HindIII and AgeI) and 3' (XhoI and EcoRI) termini of the DNA. The gene  
191 sequence was cloned into pEAQ-*HT*, using AgeI and XhoI, for expression in plants [21]. The  
192 recombinant plasmid was then transformed into *A tumefaciens* AGL1 as previously described  
193 [13]. Recombinant *A. tumefaciens* encoding human chaperones and furin were previously  
194 described [13]. The spike antigen sequence was also cloned into pTHpCapR, using HindIII  
195 and EcoRI, for expression in mammalian cells [22]. The furin expression construct used in  
196 this study was previously described [13].

#### 197 Recombinant protein production in mammalian cells

198 Protein expression as conducted in adherent HEK293 cells. Cells were maintained in DMEM  
199 (1×) + GlutaMAX™-1 (Gibco) supplemented with 10% fetal bovine serum (Gibco) and  
200 Penicillin/Streptomycin (Biowhittaker®, Lonza). Transfections were conducted using X-  
201 tremeGENE™ HP DNA Transfection Reagent in accordance with the manufacturer's  
202 instructions. Crude protein lysate was harvested 72 hours post transfection using Glo Lysis  
203 Buffer.

204

#### 205 Recombinant protein production in *Nicotiana benthamiana*

206 Protein expression in plants was conducted as previously described [13]. In the case where  
207 multiple proteins were co-expressed, equal amounts (OD<sub>600</sub>) of the relevant bacterial cultures  
208 were mixed. Crude plant homogenate was harvested 3 days post-infiltration, using Tris-  
209 buffered saline [pH 8.0], as previously detailed [19].

210

#### 211 Immunoblotting to detect expression of the SARS-CoV-2 spike

212 Equal volumes of total soluble protein were resolved on SDS-PAGE gels and then  
213 immunoblotted using established procedures [13, 19]. The recombinant spike was detected  
214 with 1:2000 of mouse monoclonal anti-histidine antibody (Serotech, MCA1396), which in  
215 turn was detected using 1:5000 goat anti-mouse IgG alkaline phosphatase conjugate (Sigma,  
216 A3562).

217

218



## 219 **References**

- 220 1. Mortimer, E., et al., *Setting up a platform for plant-based influenza virus vaccine production*  
221 *in South Africa*. BMC Biotechnol, 2012. **12**: p. 14.
- 222 2. Mullard, A., *COVID-19 vaccine development pipeline gears up*. Lancet, 2020. **395**(10239): p.  
223 1751-1752.
- 224 3. Margolin, E., et al., *Production of complex viral glycoproteins in plants as vaccine*  
225 *immunogens*. Plant Biotechnol J, 2018.
- 226 4. Murad, S., et al., *Molecular Pharming for low and middle income countries*. Curr Opin  
227 Biotechnol, 2019. **61**: p. 53-59.
- 228 5. Cummings, J.F., et al., *Safety and immunogenicity of a plant-produced recombinant*  
229 *monomer hemagglutinin-based influenza vaccine derived from influenza A (H1N1)pdm09*  
230 *virus: a Phase 1 dose-escalation study in healthy adults*. Vaccine, 2014. **32**(19): p. 2251-9.
- 231 6. Pillet, S., et al., *A plant-derived quadrivalent virus like particle influenza vaccine induces*  
232 *cross-reactive antibody and T cell response in healthy adults*. Clin Immunol, 2016. **168**: p. 72-  
233 87.
- 234 7. Pillet, S., et al., *Immunogenicity and safety of a quadrivalent plant-derived virus like particle*  
235 *influenza vaccine candidate—Two randomized Phase II clinical trials in 18 to 49 and  $\geq$ 50*  
236 *years old adults*. PLoS One, 2019. **14**(6): p. e0216533.
- 237 8. D'Aoust, M.A., et al., *Influenza virus-like particles produced by transient expression in*  
238 *Nicotiana benthamiana induce a protective immune response against a lethal viral challenge*  
239 *in mice*. Plant Biotechnol J, 2008. **6**(9): p. 930-40.
- 240 9. Margolin, E., et al., *Engineering the Plant Secretory Pathway for the Production of Next-*  
241 *Generation Pharmaceuticals*. Trends Biotechnol, 2020.
- 242 10. Wilbers, R.H., et al., *Co-expression of the protease furin in Nicotiana benthamiana leads to*  
243 *efficient processing of latent transforming growth factor-beta1 into a biologically active*  
244 *protein*. Plant Biotechnol J, 2016. **14**(8): p. 1695-704.
- 245 11. Görtzer, K., et al., *Efficient N-Glycosylation of the Heavy Chain Tailpiece Promotes the*  
246 *Formation of Plant-Produced Dimeric IgA*. Frontiers in Chemistry, 2020. **8**(346).
- 247 12. Castilho, A., et al., *An oligosaccharyltransferase from Leishmania major increases the N-*  
248 *glycan occupancy on recombinant glycoproteins produced in Nicotiana benthamiana*. Plant  
249 Biotechnol J, 2018. **16**(10): p. 1700-1709.
- 250 13. Margolin, E., et al., *Co-expression of human calreticulin significantly improves the production*  
251 *of HIV gp140 and other viral glycoproteins in plants*. Plant Biotechnol J, 2020.
- 252 14. Amanat, F. and F. Krammer, *SARS-CoV-2 Vaccines: Status Report*. Immunity, 2020.
- 253 15. Hoffmann, M., et al., *SARS-CoV-2 Cell Entry Depends on ACE2 and TMPRSS2 and Is Blocked by*  
254 *a Clinically Proven Protease Inhibitor*. Cell, 2020.
- 255 16. Song, W., et al., *Cryo-EM structure of the SARS coronavirus spike glycoprotein in complex*  
256 *with its host cell receptor ACE2*. PLoS Pathog, 2018. **14**(8): p. e1007236.
- 257 17. Walls, A.C., et al., *Structure, Function, and Antigenicity of the SARS-CoV-2 Spike Glycoprotein*.  
258 Cell, 2020.
- 259 18. Binley, J.M., et al., *Enhancing the proteolytic maturation of human immunodeficiency virus*  
260 *type 1 envelope glycoproteins*. J Virol, 2002. **76**(6): p. 2606-16.
- 261 19. Margolin, E., et al., *Production and Immunogenicity of Soluble Plant-Produced HIV-1 Subtype*  
262 *C Envelope gp140 Immunogens*. Front Plant Sci, 2019. **10**: p. 1378.
- 263 20. Maclean, J., et al., *Optimization of human papillomavirus type 16 (HPV-16) L1 expression in*  
264 *plants: comparison of the suitability of different HPV-16 L1 gene variants and different cell-*  
265 *compartment localization*. J Gen Virol, 2007. **88**(Pt 5): p. 1460-9.
- 266 21. Sainsbury, F., E.C. Thuenemann, and G.P. Lomonosoff, *pEAQ: versatile expression vectors*  
267 *for easy and quick transient expression of heterologous proteins in plants*. Plant Biotechnol J,  
268 2009. **7**(7): p. 682-93.



- 269 22. Tanzer, F.L., et al., *The porcine circovirus type 1 capsid gene promoter improves antigen*  
270 *expression and immunogenicity in a HIV-1 plasmid vaccine*. *Virology*, 2011. **8**: p. 51.  
271
